# Supplementary material for: Polymer coating of vanadium oxide nanowires to improve cathodic capacity in lithium batteries
Source: Royal Society of Chemistry journal article supplement (doi:10.1039/c3ta11049d), 2013-01-01
Supplement: c3ta11049d.pdf [file c3ta11049d.pdf]

# Polymer Coating of Vanadium Oxide Nanowires to Improve Cathodic Capacity in Lithium Batteries Supplemental Information

Forrest S. Gittleston, Jonathan Hwang, Ryan C. Sekol, André D. Taylor

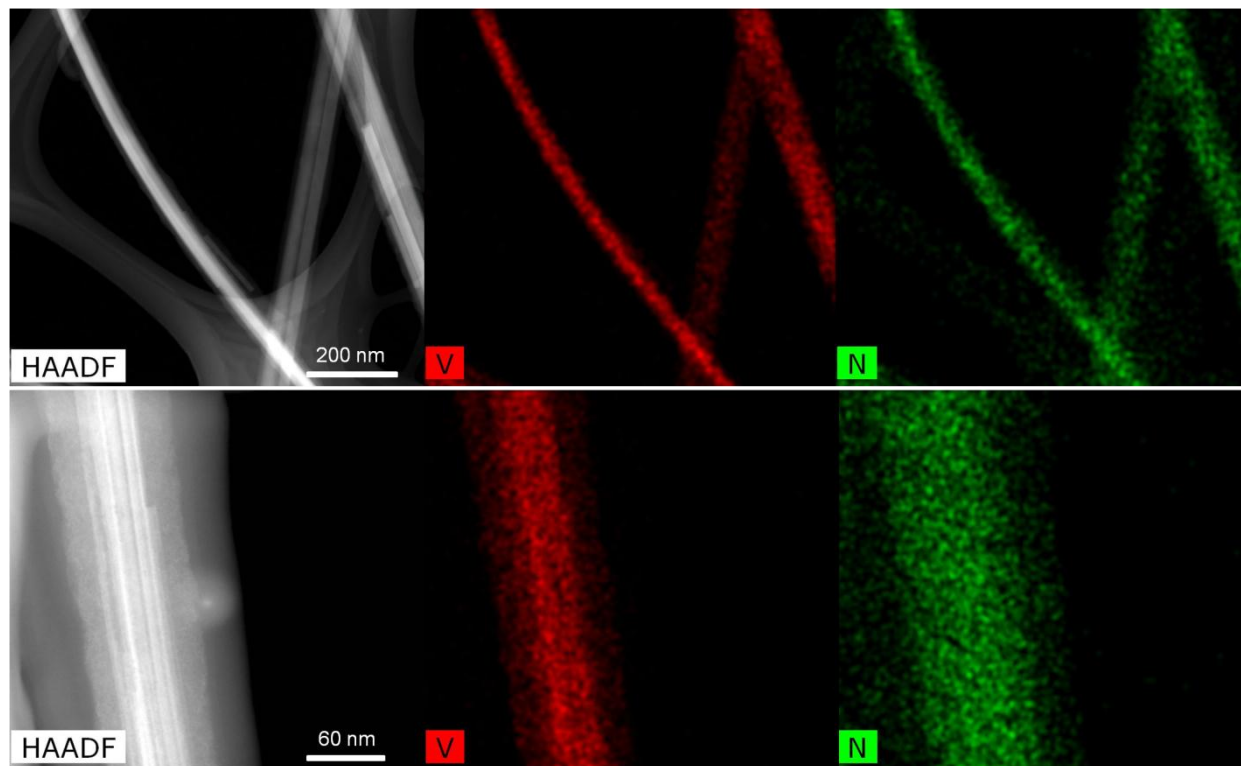

S1. STEM elemental mapping of V<sub>2</sub>O<sub>5</sub>-PANI Sample 2 (top) and Sample 4 (bottom) nanowire composites with vanadium (red) and nitrogen (green), used as an indicator of PANI.

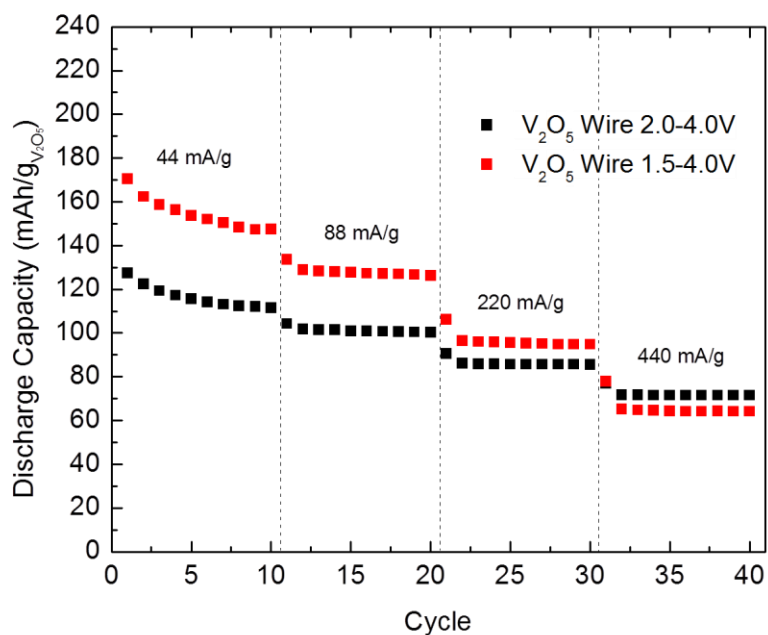

S2. Galvanostatic cycling results for V<sub>2</sub>O<sub>5</sub> wire electrodes, 40 cycles at increasing rates (44, 88, 220, 440 mA/g) between 1.5-4.0V and 2.0-4.0V.

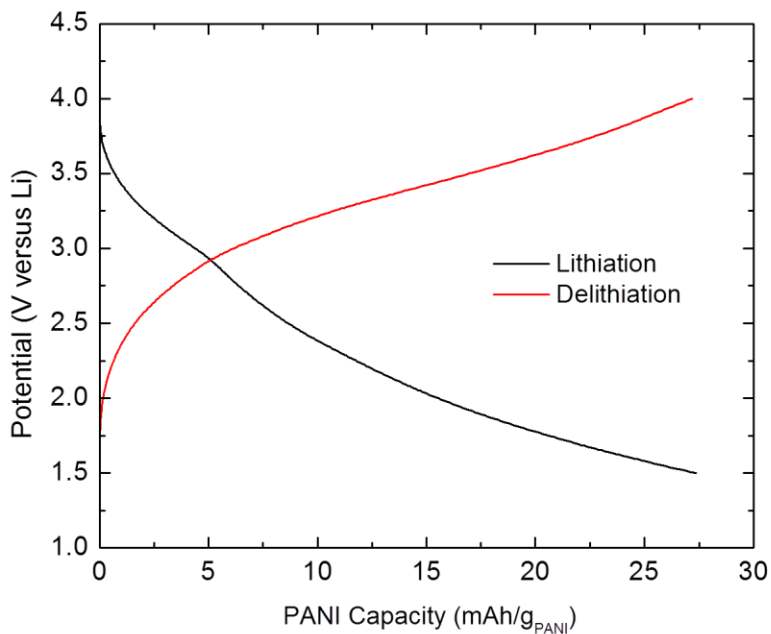

S3. First cycle capacity profile of 30% by weight PANI deposited on carbon black. Discharge capacity is ~27 mAh/g<sub>PANI</sub>, which agrees with previous literature.

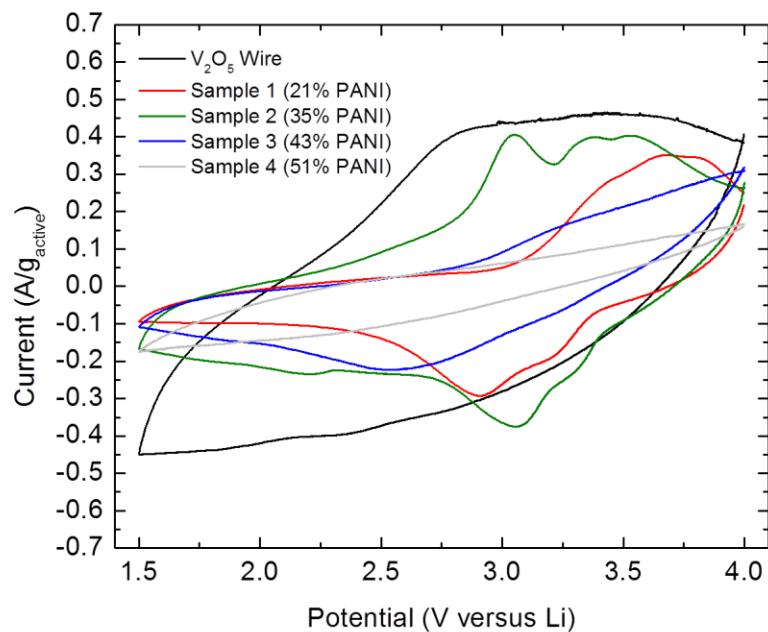

S4. Cyclic voltammograms of  $V_2O_5$ -PANI samples and  $V_2O_5$  wire control at a scan rate of 1 mV/s.

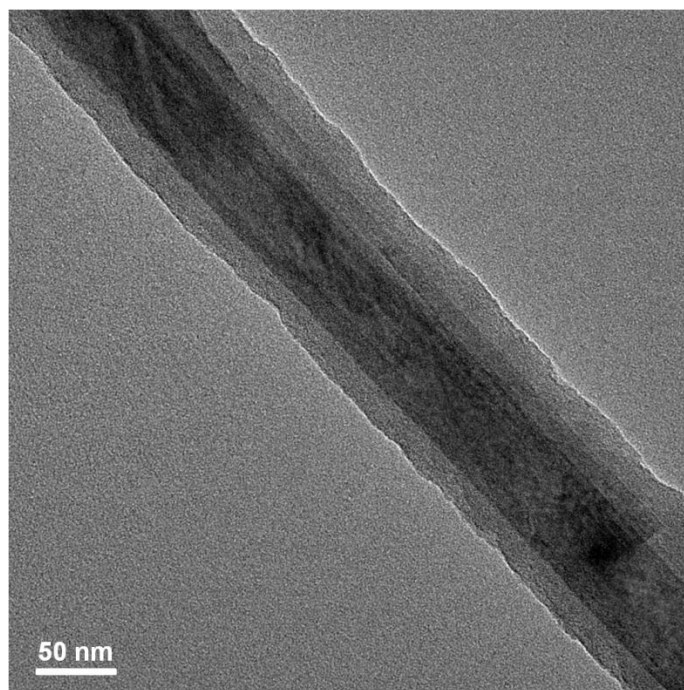

S5. TEM image of  $V_2O_5$ -PANI Sample 4 after 100 cycles at 440 mA/g. This confirms the stability of the polyaniline layer for most of the electrode, although the SEM in Figure 4d suggests that the electrode surface may be less stable.

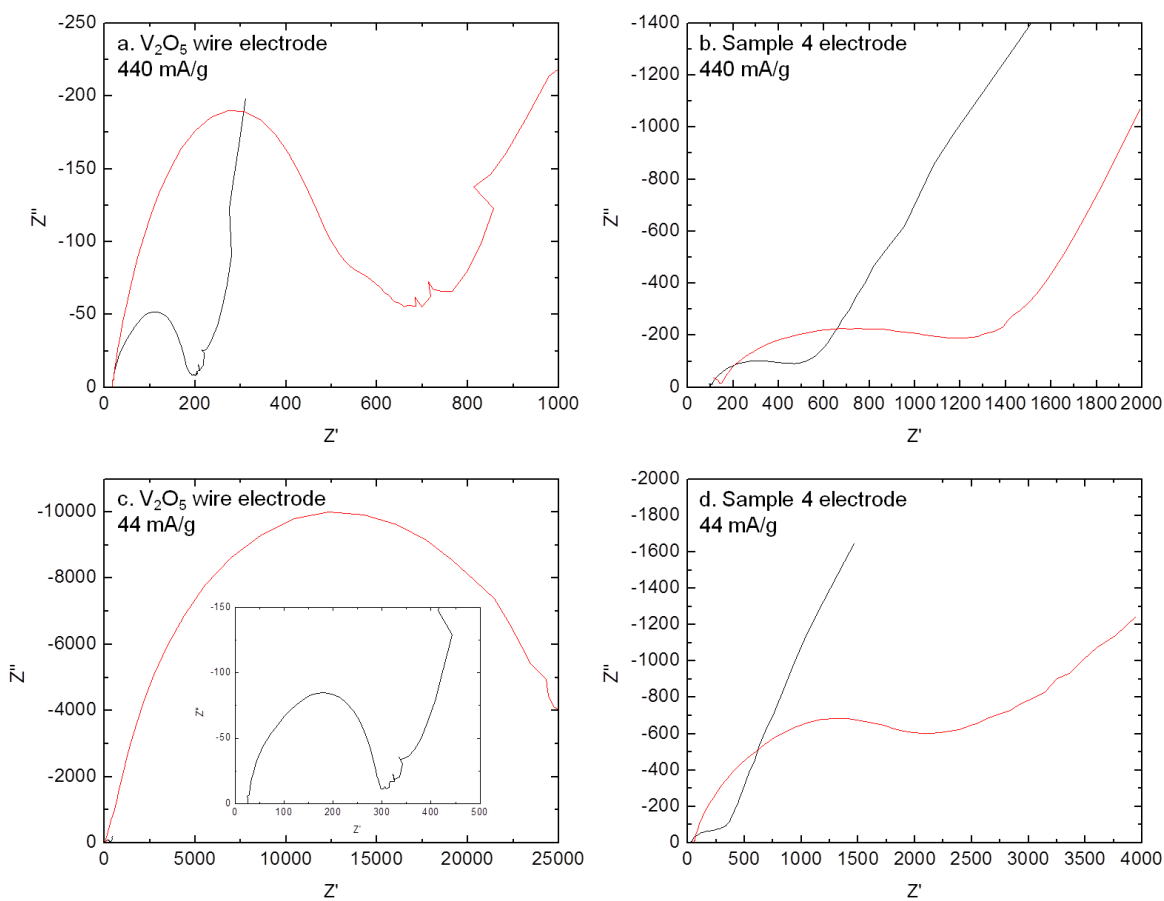

S6. Impedance measurements before (black) and after (red) long term cycling of  $V_2O_5$  wire and Sample 4 electrodes at (a,b) 440 mA/g for 100 cycles or (c,d) 44 mA/g for 50 cycles.

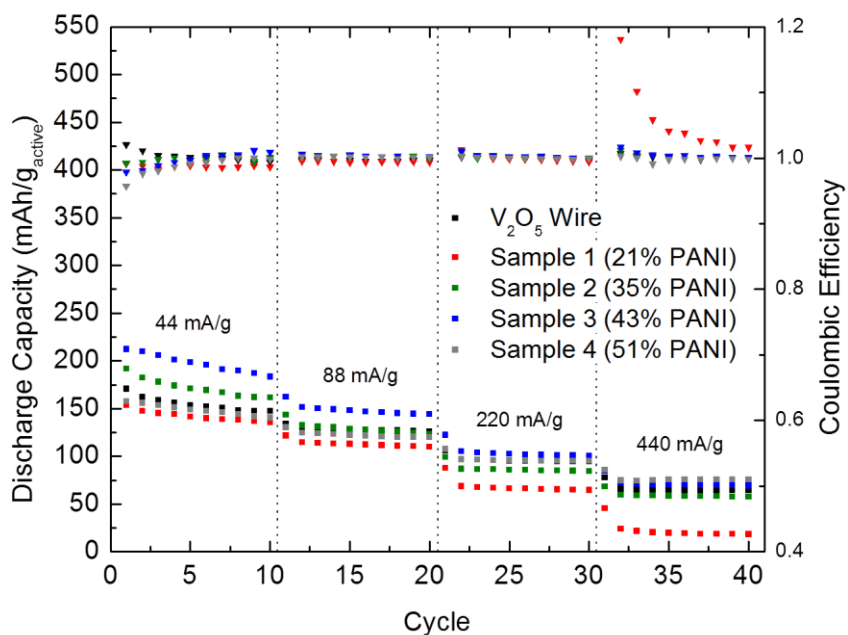

S7. Half-cell capacity of active material over under several charge rates, unnormalized from Figure 5.

| <u>V<sub>2</sub>O<sub>5</sub>-PANI Sample</u> | <u>APS:An Molar Ratio</u> | <u>Weight % PANI</u> |
|-----------------------------------------------|---------------------------|----------------------|
| 1                                             | 0.2                       | 21                   |
| 2                                             | 0.5                       | 35                   |
| 3                                             | 0.7                       | 43                   |
| 4                                             | 1.0                       | 51                   |

Supplementary Table 1. V<sub>2</sub>O<sub>5</sub>-PANI samples with varying weight percentages of PANI.
